# Supplementary material for: The Antihistamine Deptropine Induces Hepatoma Cell Death through Blocking Autophagosome-Lysosome Fusion
Source: MDPI journal article supplement (doi:10.3390/cancers12061610), 2020-06-18
Supplement: s1 [file s1]

# The Antihistamine Deptropine Induces Hepatoma Cell Death Through Blocking Autophagosome-Lysosome Fusion

Yu-Chih Liang, Chi-Ching Chang, Ming-Thau Sheu, Shyr-Yi Lin, Chia-Chen Chung, Chang-Ting Teng and Fat-Moon Suk

Supplementary Material

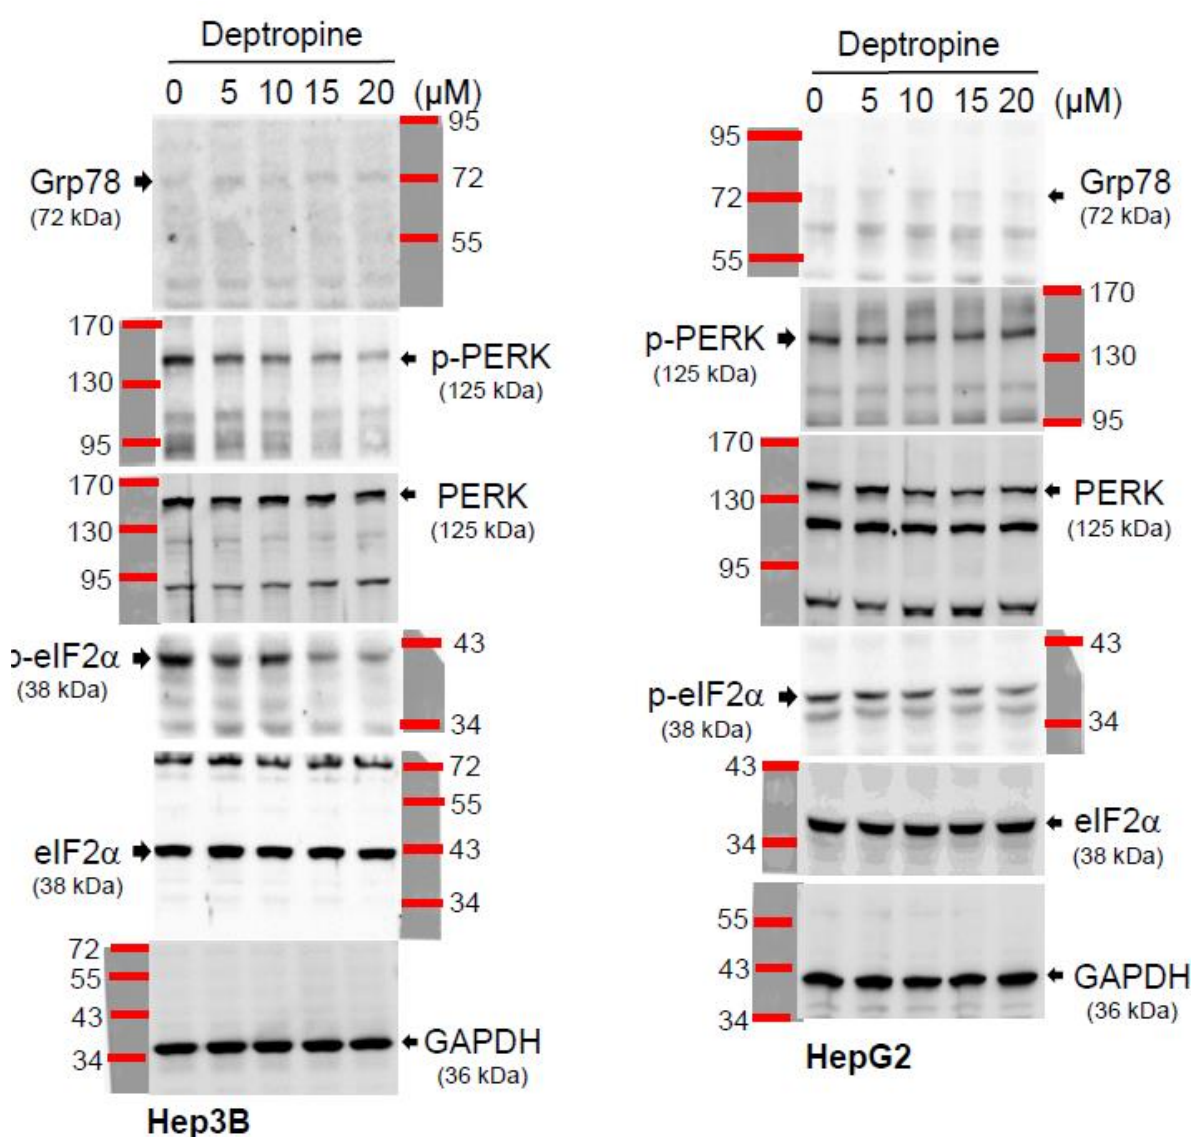

**Figure S1.** Uncropped Western Blots of Figure 3a.

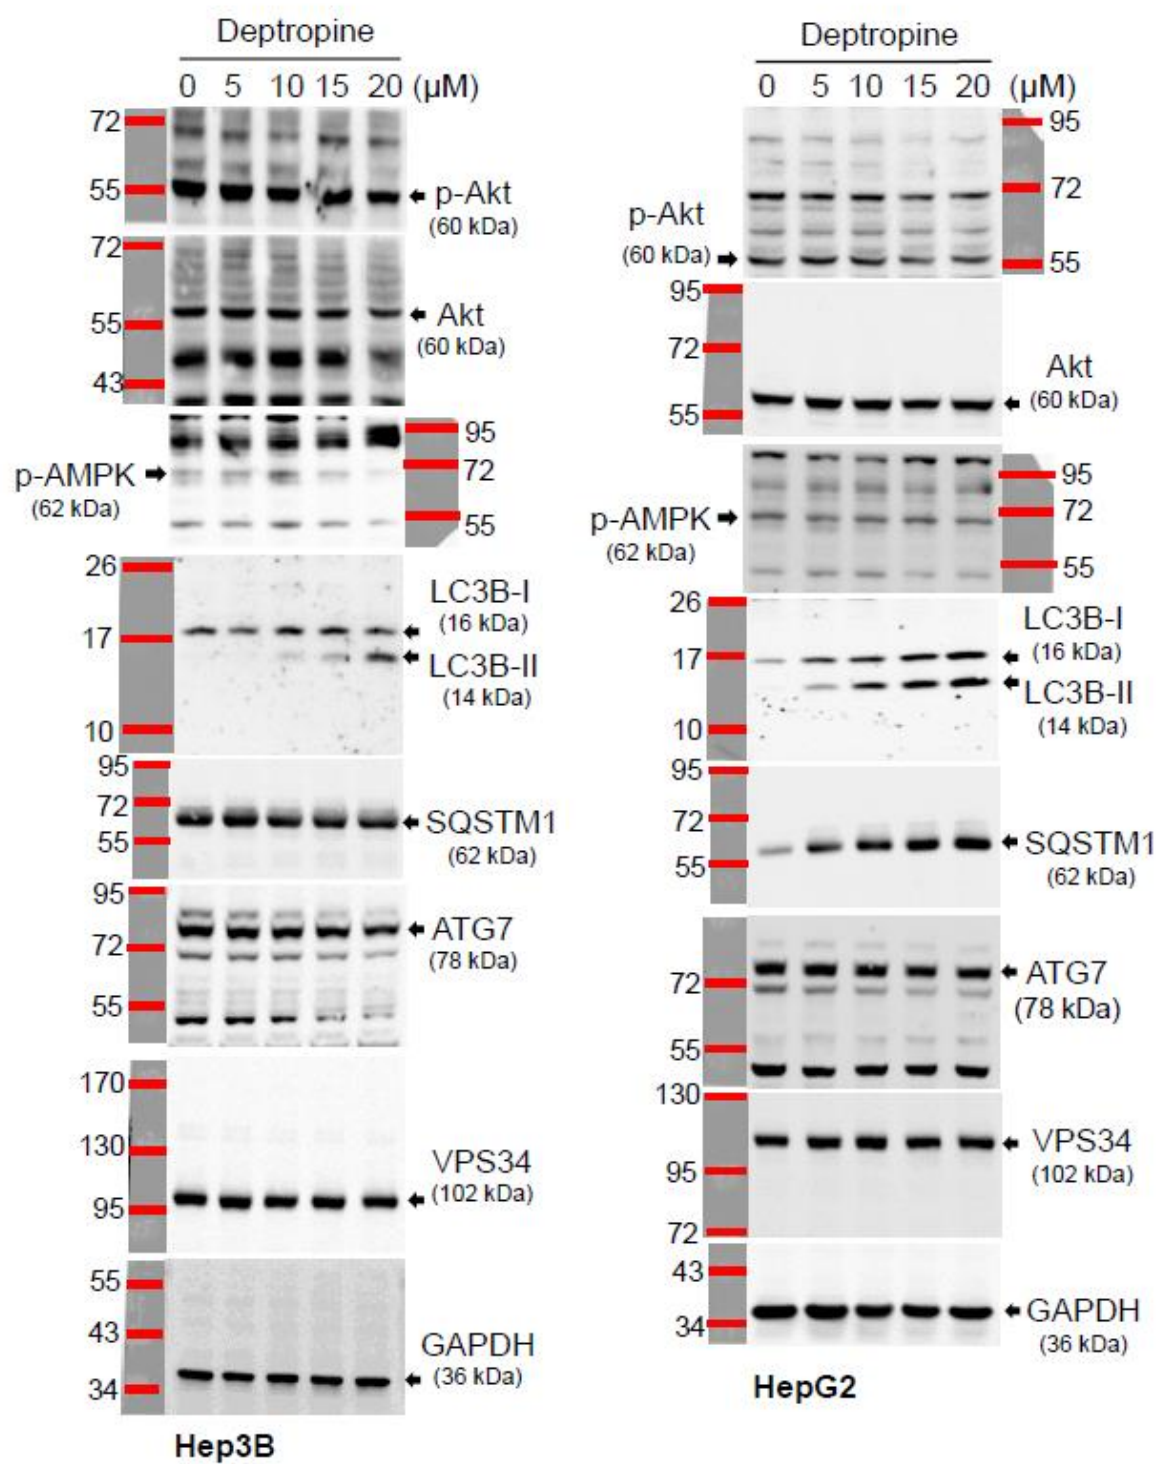

Figure S2. Uncropped Western Blots of Figure 3b.

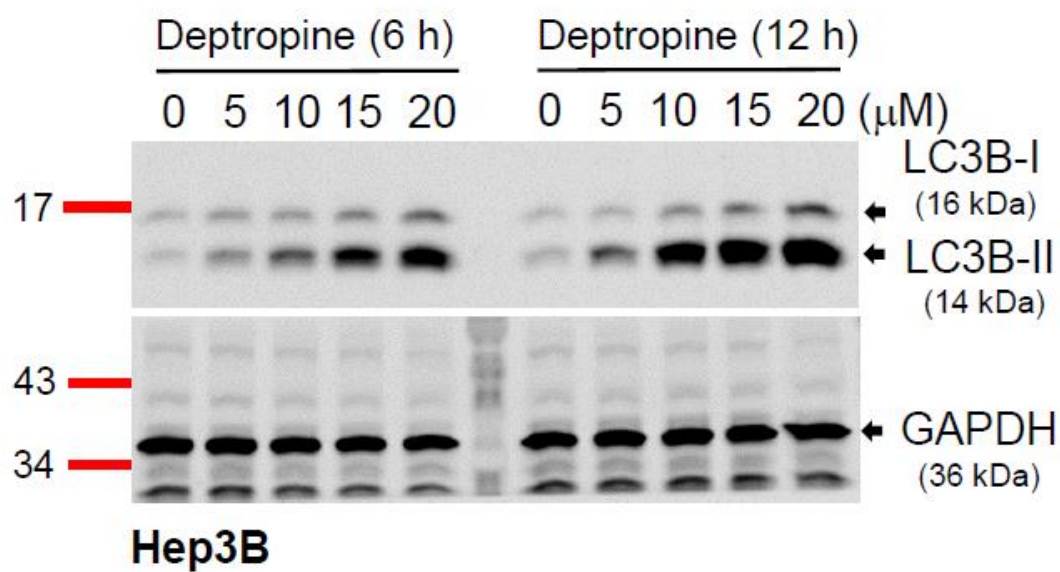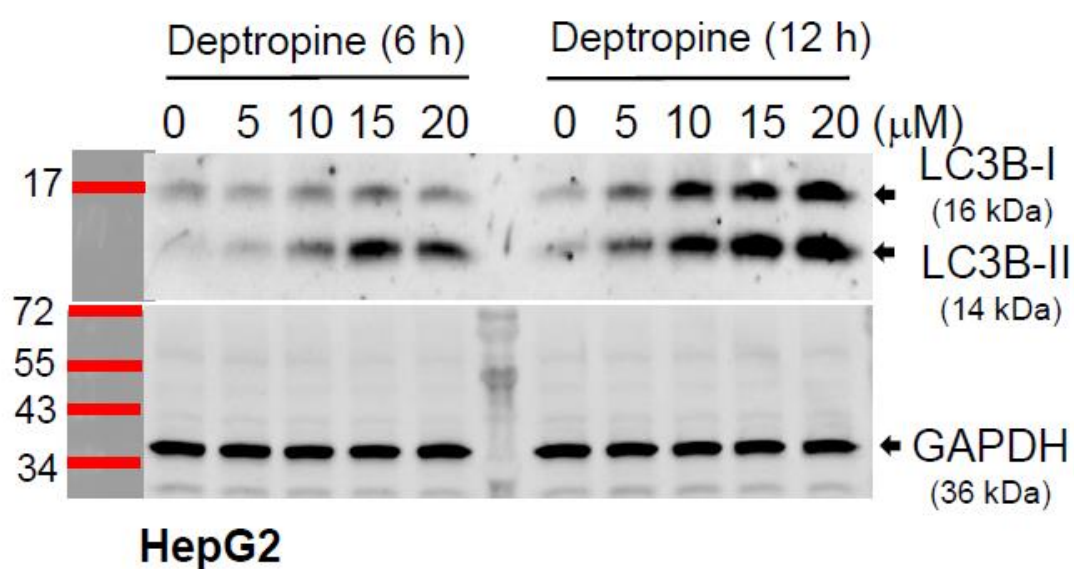

Figure S3. Uncropped Western Blots of Figure 3c.

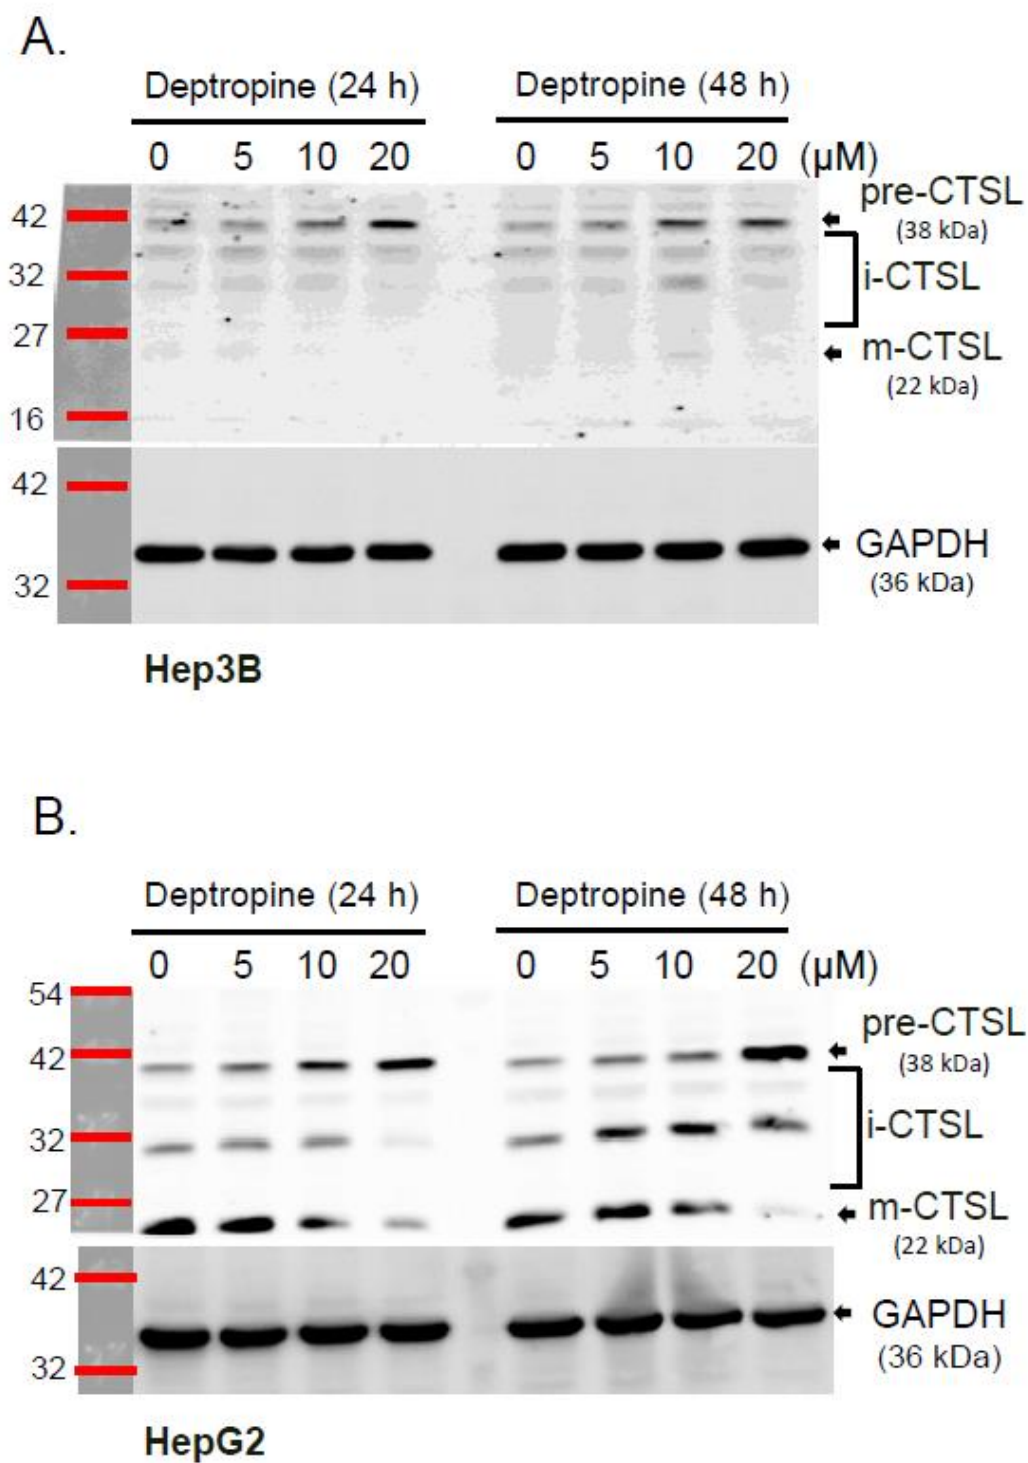

**Figure S4.** Uncropped Western Blots of Figure 5. (A) Hep3B cells and (B) HepG2 cells.

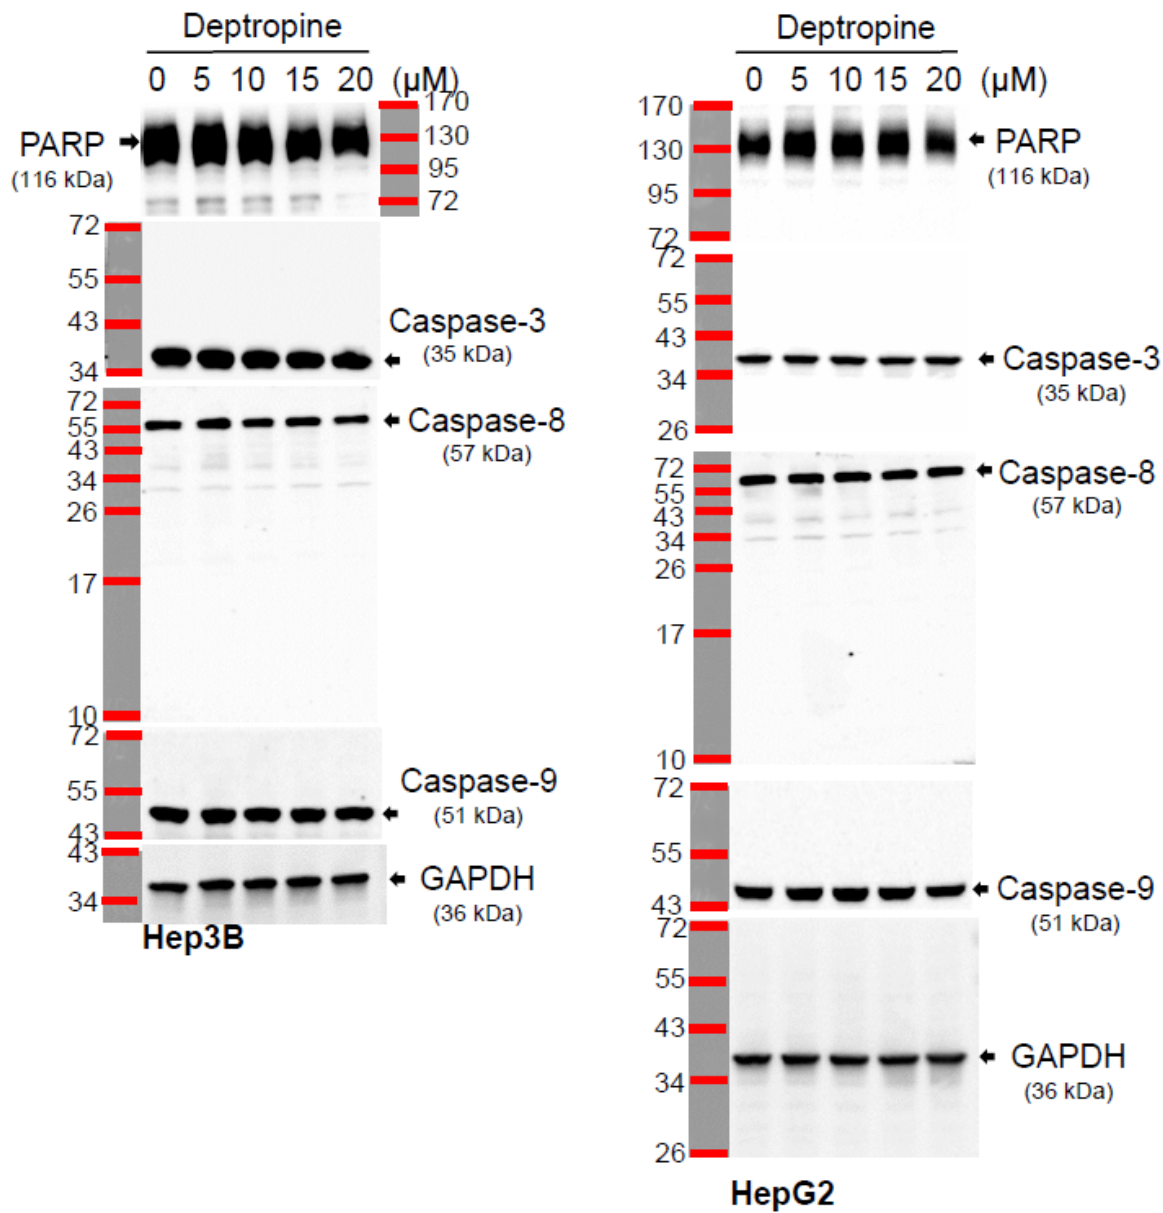

Figure S5. Uncropped Western Blots of Figure 6a.
